# Supplementary material for: Molecular Characterization of c-Abl/c-Src Kinase Inhibitors Targeted against Murine Tumour Progenitor Cells that Express Stem Cell Markers
Source: PLOS journal article supplement (doi:10.1371/journal.pone.0014143), 2010-11-30

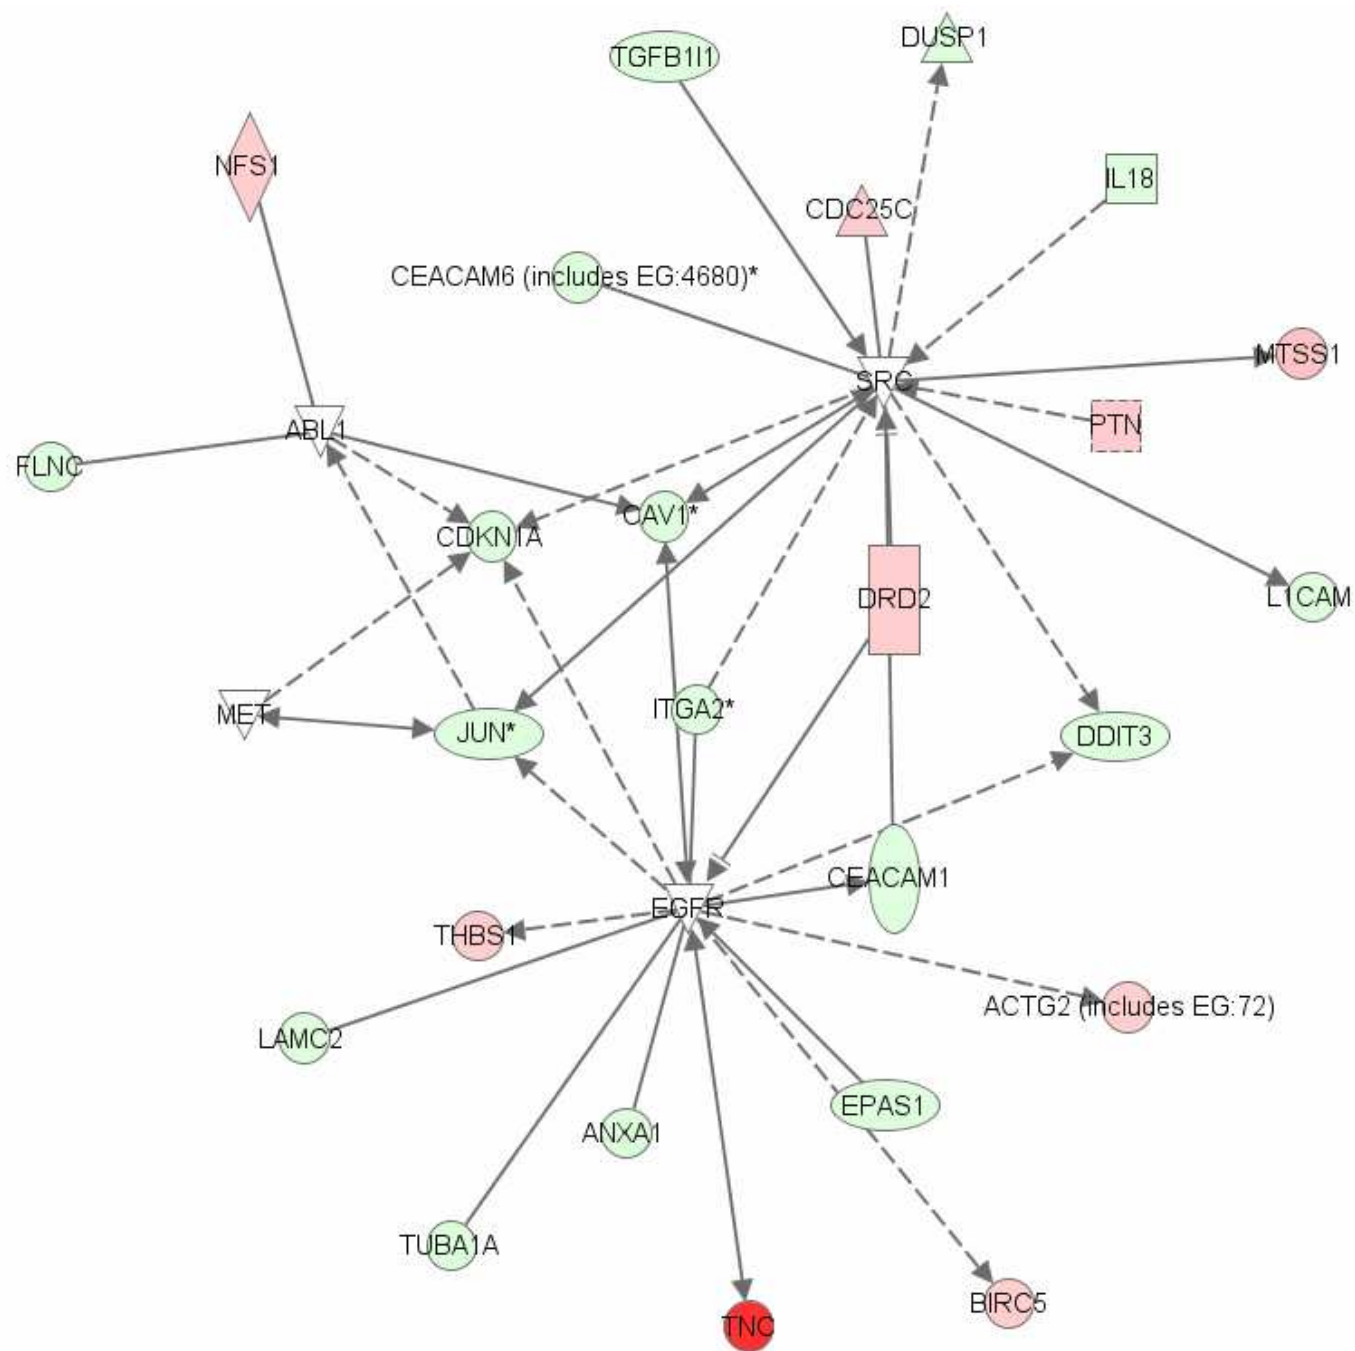

Supplement: S9 (10.1371/journal.pone.0014143.s009) [file journal.pone.0014143.s009]
