# Supplementary material for: Molecular Characterization of c-Abl/c-Src Kinase Inhibitors Targeted against Murine Tumour Progenitor Cells that Express Stem Cell Markers
Source: PLoS One. 2010 Nov 30;5(11):e14143. doi: 10.1371/journal.pone.0014143 (PMC2994747; doi:10.1371/journal.pone.0014143)
Supplement: Table S1 — Cancer stem cell markers expressed in tested tumour cell lines. Mean values in percent compared to non-transgenic and appropriate controls. (0.01 MB XLS) [file pone.0014143.s011.xls]

## Sheet: Tabelle1
		Cell lines	Cd34	Cd24a	Cd44	Cd133	Thy1/ Cd 90	Pdpn	Nes	Dlg7
		A2C12	124.505	1155.6	274.298	11.5154	22.0175	99.0788	41.041	126.9
		BetaD5	287.886	879.917	108.153	10.7784	20.0829	112.068	30.585	191.294
		GammaA3	229.203	1390.88	76.4164	11.5615	24.2745	127.453	30.3547	141.133
		GammaD12	376.278	1362.55	89.8204	12.4827	23.7678	127.176	53.6158	154.399
		Cell lines	CD34	CD244	CD44	CD133	THY1/CD90	PDPN	NES	DLG7
		A549	354.059	343.41	145.521	219.495	681.163	22.8358	600.641	252.141
		CaCo2	33.4045	42.2891	16.4746	51.7412	30.3487	48.0869	189.036	478.687
		HepG2	297.032	23.3164	22.3434	247.031	19.3405	96.0609	416.865	875.109
