# Supplementary material for: Molecular Characterization of c-Abl/c-Src Kinase Inhibitors Targeted against Murine Tumour Progenitor Cells that Express Stem Cell Markers
Source: PLoS One. 2010 Nov 30;5(11):e14143. doi: 10.1371/journal.pone.0014143 (PMC2994747; doi:10.1371/journal.pone.0014143)
Supplement: Table S2 — Calculated IC50 values after single treatment for 24 h. Values are displayed in µmol/l. n.a.: not applicable. IC50>100 µmol/l. (0.02 MB XLS) [file pone.0014143.s012.xls]

## Sheet: Tabelle1
				Cell lines
				A2C12	BetaD5	GammaA3	GammaD12	A549	CaCo2	HepG2
		Compounds	Si20	28.1 ± 4.6	27.0 ± 7.9	21.5 ± 2.3	17.1 ± 1.5	25.1 ± 2.6	56.2 ± 2.0	56.2 ± 2.1
			Si27	n.a.	n.a.	n.a.	n.a.	n.a.	n.a.	n.a.
			Si34	32.8 ± 4.8	37.0 ± 2.3	25.2 ± 3.1	23.2 ± 2.5	69.5 ± 27.7	58.2 ± 4.2	58.5 ± 3.0
			Si40	n.a.	43.6 ± 3.6	n.a.	26.0 ± 3.0	n.a.	n.a.	n.a.
			Si51	n.a.	n.a.	n.a.	n.a.	n.a.	n.a.	n.a.
			Si57	24.8 ± 0.2	19.6 ± 1.5	26.6 ± 4.2	14.6 ± 0.7	43.4 ± 8.0	77.1 ± 7.5	77.2 ± 7.5
			Si65	25.9 ± 4.3	22.6 ± 1.9	31.9 ± 1.6	21.0 ± 1.0	22.7 ± 0.6	40.3 ± 0.9	40.3 ± 0.9
			Si66	23.7 ± 2.2	20.7 ± 0.4	23.7 ± 2.0	14.2 ± 1.7	21.6 ± 2.6	44.7 ± 5.9	44.7 ± 5.9
			Si70	68.5 ± 16.8	31.0 ± 5.1	40.7 ± 6.2	21.6 ± 1.6	96.0 ± 35.1	82.1 ± 5.3	82.1 ± 5.3
			Si81	30.8 ± 2.5	20.6 ± 4.0	26.8 ± 1.5	17.4 ± 2.6	n.a.	72.9 ± 6.4	72.9 ± 6.4
			Si93	16.9 ± 0.9	13.8 ± 2.0	15.6 ± 0.6	11.8 ± 0.4	21.5 ± 4.2	65.6 ± 2.7	65.6 ± 2.7
			Si104	16.2 ± 1.0	12.6 ± 2.6	18.3 ± 0.7	13.2 ± 0.9	17.8 ± 2.6	40.8 ± 1.7	40.9 ± 1.7
			Si135	25.5 ± 3.8	13.0 ± 2.2	10.0 ± 2.2	14.7 ± 0.6	26.1 ± 2.6	64.6 ± 10.3	64.6 ± 10.3
			Si142	40.4 ± 2.1	11.0 ± 0.7	18.7 ± 4.0	11.8 ± 1.6	n.a.	89.2 ± 4.6	89.2 ± 4.6
			Si162	17.6 ± 1.2	8.3 ± 1.2	13.1 ± 1.1	11.6 ± 1.3	21.9 ± 2.7	n.a.	34.7 ± 3.4
			Si166	16.6 ± 1.2	14.0 ± 2.1	17.0 ± 2.3	18.1 ± 1.4	20.2 ± 2.5	37.7 ± 2.4	37.7 ± 2.4
			Si167	16.4 ± 0.8	12.4 ± 1.0	20.5 ± 1.2	19.5 ± 0.8	19.8 ± 2.8	32.2 ± 1.7	32.2 ± 1.7
			Imatinib	16.4 ± 3.3	33.9 ± 3.2	12.9 ± 1.7	9.7 ± 3.9	18.5 ± 6.4	27.6 ± 8.7	n.a.
			Dasatinib	9.8 ± 1.5	5.2 ± 0.6	1.18 ± 0.1	2.6 ± 1.0	39.8 ± 5.8	n.a.	26.2 ± 2.8
