# Supplementary material for: Molecular Characterization of c-Abl/c-Src Kinase Inhibitors Targeted against Murine Tumour Progenitor Cells that Express Stem Cell Markers
Source: PLoS One. 2010 Nov 30;5(11):e14143. doi: 10.1371/journal.pone.0014143 (PMC2994747; doi:10.1371/journal.pone.0014143)
Supplement: Table S6 — Selected significantly regulated genes after treatment with dual kinase inhibitor Si162. Significantly regulated genes were analyzed with SAM. All values are displayed as log2 of fold change. (0.03 MB XLS) [file pone.0014143.s016.xls]

## Sheet: Si162 vs Ktr FC 
	regulated genes	Entrez gene name	A2C12	GammaA3	A549	CaCo2	HepG2
	cell cycle, DNA repair, checkpoint control, proliferation
	Ccna2	cyclin A2	-4.4791	-2.92533	-6.9329
	Ccnb1	cyclin B1			-5.42875
	Ccnb2	cyclin B2	-4.50513	-2.43669	-6.14875
	Cdc2	cell division cycle 2 (Cdk1)		-2.11703	-7.06106		-5.34451
	Cdkn1a	cyclin-dependent kinase inhibitor 1A (p21Cip1)		1.27369	2.54204		1.62371
	Cdkn2a	cyclin-dependent kinase inhibitor 2A (p16)					2.0315
	Cdkn2b	cyclin-dependent kinase inhibitor 2B (p15)		1.12942			3.43129
	Cdkn3	cyclin-dependent kinase inhibitor 3		-2.80323	-5.89542
	Cenpa	centromere protein A	-4.34206	-2.6173	-6.17151		-4.34674
	Gadd45a	growth arrest and DNA-damage-inducible, alpha	1.40316	2.77695	1.46355
	Mdm2	Mdm2 p53 binding protein homolog (mouse)	1.87885	2.15329	1.95512		1.14529
	Plk1	polo-like kinase 1 (Drosophila)	-4.48278	-3.16832	-2.11603
	Tp53	tumor protein p53	-4.50303
	tumor growth, signaling pathways
	Akt2	v-akt murine thymoma viral oncogene homolog 2					-4.46591
	Cav1	caveolin 1, caveolae protein, 22kDa				2.45008
	Crk	v-crk sarcoma virus CT10 oncogene homolog (avian)		-2
	Ctnnb1	catenin (cadherin-associated protein), beta 1, 88kDa		1.93512
	Ctsb	cathepsin B	1.12942	1.20257	1.37932
	Dgka	diacylglycerol kinase, alpha 80kDa		2.89754	1.9203
	E2F1	E2F transcription factor 1			-6.54464
	Egfr	epidermal growth factor receptor					1.36438
	Errfi1	ERBB receptor feedback inhibitor 1	-4.37567
	Grb10	growth factor receptor-bound protein 10		3.64928			1.12438
	Gsk3b	glycogen synthase kinase 3 beta		1.12218	1.5121
	Inpp5d	inositol polyphosphate-5-phosphatase, 145kDa			2.26743
	Jakmip3	janus kinase and microtubule interacting protein 3		4.06854
	Jun	jun oncogene			1.36327		1.14465
	Nfib	nuclear factor I/B	-4.56181	-1.23389
	Notch3	Notch homolog 3 (Drosophila)		2.78389
	Ogn	osteoglycin	-5.76604	-5.01413
	Pdgfrb	platelet-derived growth factor receptor, beta polypeptide	-4.67503				-4.81486
	Pik3ca	phosphoinositide-3-kinase, catalytic, alpha polypeptide		1.2709
	Plcg2	phospholipase C, gamma 2		1.35845
	Ptgs2	prostaglandin-endoperoxide synthase 2			1.26639
	Ptk2	PTK2 protein tyrosine kinase 2 (FAK)		1.99022
	Ptn	pleiotrophin	-4.92239
	Rock1	Rho-associated, coiled-coil containing protein kinase 1		1.13638
	Srf	serum response factor	-4.67644	-1.11503
	Tec	tec protein tyrosine kinase		3.51128
	Tgfb1i1	transforming growth factor beta 1 induced transcript 1	-4.5867		1.15072		1.85621
	Tgfb2	transforming growth factor, beta 2		-1.6893
	Tgfb3	transforming growth factor, beta 3	-4.48633
	Tlr4	toll-like receptor 4	1.08865
	cytoskeleton, metastasis, invasion, cell motility
	Acta2	actin, alpha 2, smooth muscle, aorta			2.45641
	Actg2	actin, gamma 2, smooth muscle, enteric	-4.94035	-4.77516
	Ccl5	chemokine (C-C motif) ligand 5	2.52118
	Cdh1	cadherin 1, type 1, E-cadherin (epithelial)			1.36179		1.32121
	Ceacam6	carcinoembryonic antigen-related cell adhesion molecule 6			3.24469	1.49289
	Cxcl12	chemokine (C-X-C motif) ligand 12	-1.04544	-2.74369
	Fn1	fibronectin 1			1.40278
	Itga5	integrin, alpha 5 (fibronectin receptor, alpha polypeptide)	-4.81029
	Itga6	integrin, alpha 6		4.04216
	Itgb4	integrin, beta 4			1.48076
	Mmp1	matrix metallopeptidase 1 (interstitial collagenase)				1.71312
	Mmp13	matrix metallopeptidase 13 (collagenase 3)	3.90185	2.98051
	Mmp3	matrix metallopeptidase 3 (stromelysin 1, progelatinase)	3.27509	2.72929			4.17137
	Sfrp1	secreted frizzled-related protein 1	1.12312
	Spp1	secreted phosphoprotein 1	1.21156	1.00723
	Tnc	tenascin C	-5.19775	-1.32193
	Tuba1a	tubulin, alpha 1a			1.0613	1.00926	4.28209
	Vim	vimentin				1.8044
	Vtn	vitronectin			4.53952
	Zyx	zyxin	-5.46689	-1.59168
	apoptosis
	Bcl2l1	BCL2-like 1					1.08284
	Bcl2l11	BCL2-like 11 (apoptosis facilitator) (Bim)		1.33497
	Birc5	baculoviral IAP repeat-containing 5		-3.03949	-6.60211		-4.98308
	Capn12	calpain 12			1.15972
	Capn2	calpain 2, (m/II) large subunit					2.33935
	Capn5	calpain 5		1.96353
	Casp3	caspase 3, apoptosis-related cysteine peptidase					1.07522
	Casp6	caspase 6, apoptosis-related cysteine peptidase		1.0743			1.01217
	Fas	Fas (TNF receptor superfamily, member 6)		1.39821	2.17984		2.45799
	Lrdd	leucine-rich repeats and death domain containing (Pidd)		1.02738
	Perp	PERP, TP53 apoptosis effector		6.08804
	Pmaip1	phorbol-12-myristate-13-acetate-induced protein 1 (Noxa)		1.93898		1.12312	1.37109
